# Supplementary material for: Lignin-grafting alternative copolymer of 3,4-dihydrocoumarin and epoxides as an active and flexible ingredient in sunscreen
Source: Royal Society of Chemistry journal article supplement (doi:10.1039/d3gc00531c), 2023-01-01
Supplement: d3gc00531c1.pdf [file d3gc00531c1.pdf]

## Supporting Information

Lignin-grafting alternative copolymer of 3,4-dihydrocoumarin  
and epoxides as an active and flexible ingredient in sunscreen

Pengcheng Liu,<sup>a</sup> Yuanlong Guo,<sup>a</sup> Gu Guo,<sup>a</sup> Lei Dai,<sup>b</sup> Gang Hu,<sup>a</sup> Haibo Xie\*

<sup>a</sup>Department of Polymeric Materials & Engineering, Guizhou University, West  
Campus, Guizhou University, Huaxi District, Guiyang, P.R. China, 550025

<sup>b</sup> Changchun Institute of Applied Chemistry, Chinese Academy of Sciences

### Corresponding Author

\*Email: [hbxie@gzu.edu.cn](mailto:hbxie@gzu.edu.cn)

Tel./Fax : +86-411-84379852

## 1.0 Experimental details

### 1.1 Details of <sup>31</sup>P NMR test method

20 mg of lignin was dissolved in anhydrous pyridine and deuterated chloroform (500  $\mu$ L, 1.6:1, v/v). Then, the internal standard solution (100  $\mu$ L, 0.1212 mol/L, internal N-hydroxy-5-norbornene-2,3-dimethylidene imide in Py-D<sub>5</sub>/CDCl<sub>3</sub>) and chromium acetylacetonate (III) (25  $\mu$ L, 0.0312 mol/L) as the relaxation reagent were added. The mixture was reacted with 100  $\mu$ L of a phosphating reagent (2-chloro-4,4,5,5-tetramethyl-1,3,2-dioxaphospholane, TMDP) for 10 min and transferred into a 5 mm NMR tube, which was subsequently analyzed for <sup>31</sup>P NMR spectra on Bruker AVANCE III 400 MHz.

### 1.2 Antioxidation assay details

First, EHL-g-P(DHC-*alt*-SO) solutions with different concentrations (0.1, 0.5, 1, and 5 mg/mL) were prepared in DMF. DPPH was dissolved in ethanol to form a dark purple solution of 0.1 mM and stored in a dark environment. 25  $\mu$ L EHL-g-P(DHC-*alt*-SO) solutions of different concentrations were added to 200  $\mu$ L DPPH ethanol solution and stored in the dark. Absorbance at 517 nm was measured at different time intervals using a microplate reader (Epoch, Biotek, USA). The ELISA plate was heated by a microporous plate thermostatic oscillator (BE-9010, China). The blank group was 200  $\mu$ L ethanol solution containing 25  $\mu$ L EHL-g-P(DHC-*alt*-SO), and the control group was 200  $\mu$ L DPPH ethanol solution containing 25  $\mu$ L DMF. Three groups of parallel experiments were set for each test, and the average value was taken at last.

### 1.3 Cytotoxicity assay details

L929 cells (mouse fibroblast cell line, provided by Zhi's group, Southwest Jiaotong University) were cultured in the minimum essential medium - $\alpha$  ( $\alpha$ -MEM) supplemented with 10% newborn calf serum and 1% penicillin and streptomycin at 37  $^{\circ}$ C and 5% CO<sub>2</sub>. LD5S5-3 was used in the cytotoxicity evaluation and cell live/dead staining. Cytotoxicity of LD5S5-3 CCK-8 cell proliferation and cytotoxicity detection kit was determined by in vitro culture method (Beijing China Petroleum & Chemical Corporation limited); LD5S5-3 was first dissolved in DMSO to form a homogeneous solution, and then diluted in proportion with DMSO.  $5 \times 10^4$  L929 cells were inoculated in 24-well plates. After attachment, 10  $\mu$ L of DMSO diluted LD5S5-3 solution was added to the medium to reach the corresponding concentrations (0.05, 0.1, 0.2, 0.5 and 1 mg/mL). After culturing for 24 h, the cells were washed 3 times with PBS, placed in a 150  $\mu$ L culture medium containing 10% CCK-8 solution, and incubated at 37 $^{\circ}$ C for 4 h. The absorbance at 450 nm was measured by a microplate reader (Epoch, Biotek, USA). Meanwhile, cells cultured in a pure medium were used

as a control group. Cell viability/death staining was also performed.  $5 \times 10^4$  L929 cells were seeded into 24-well plates. After attachment, different DMSO diluted LD5S5-3 solutions were added to the medium. After culturing for 24 h, washed with PBS 3 times, then stain with Calcein-AM (Sigma, USA) and propidium iodide (PI) (Sigma, USA), and finally photograph with a fluorescence microscope (IX73, Olympus, Japan).

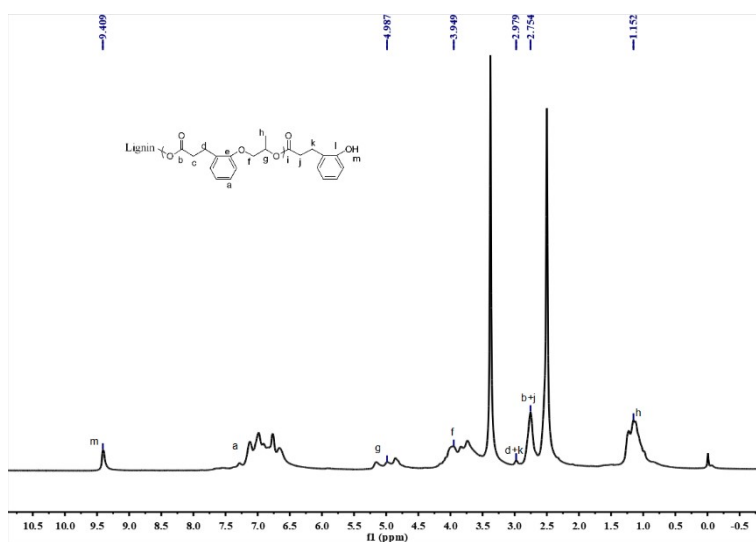

**Fig. S1**  $^1\text{H}$  NMR spectra of LD5P5.

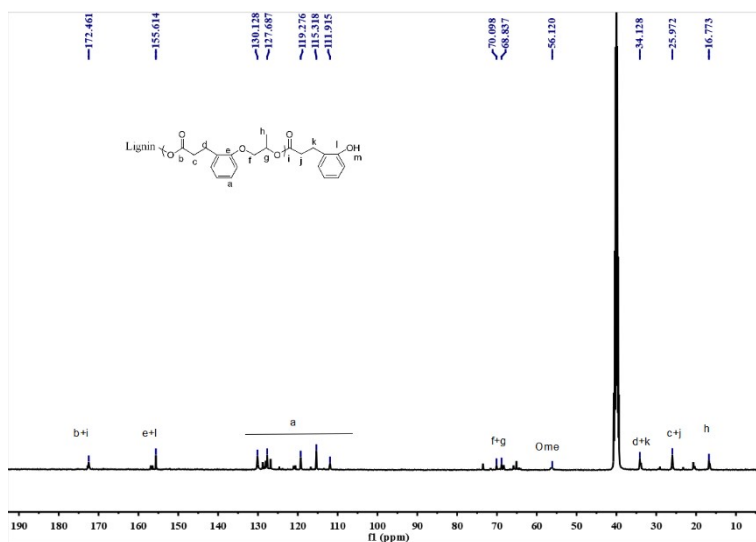

**Fig. S2**  $^{13}\text{C}$  NMR spectra of LD5P5.

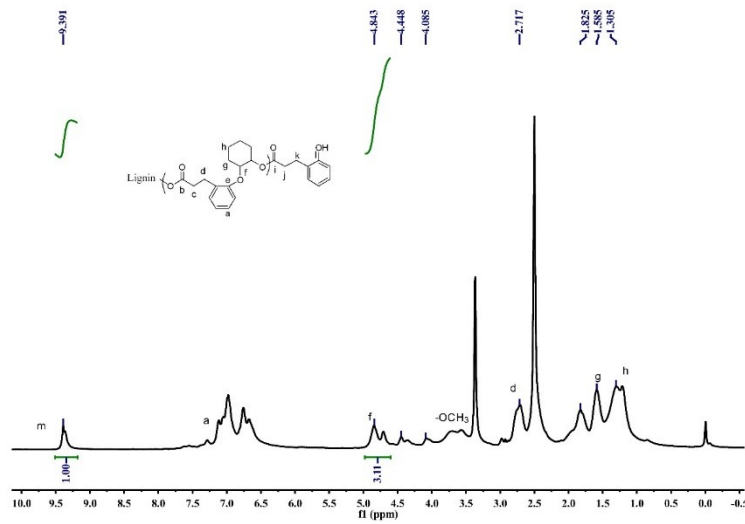

Fig. S3  $^1\text{H}$  NMR spectra of LD5C5.

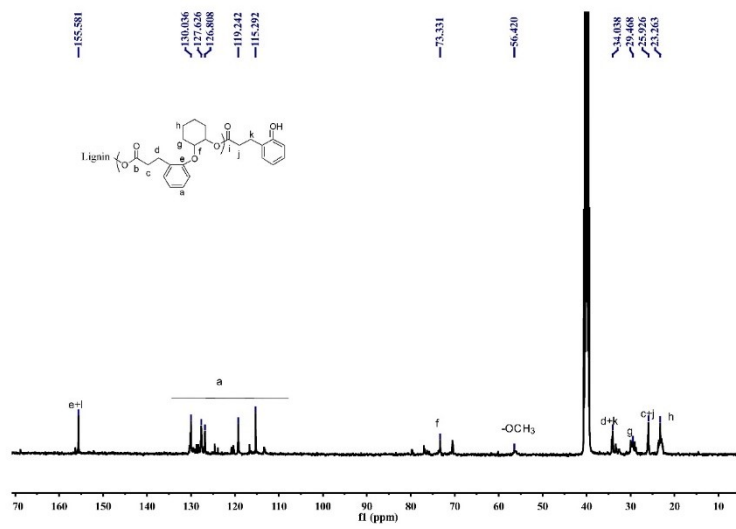

Fig. S4  $^{13}\text{C}$  NMR spectra of LD5C5.

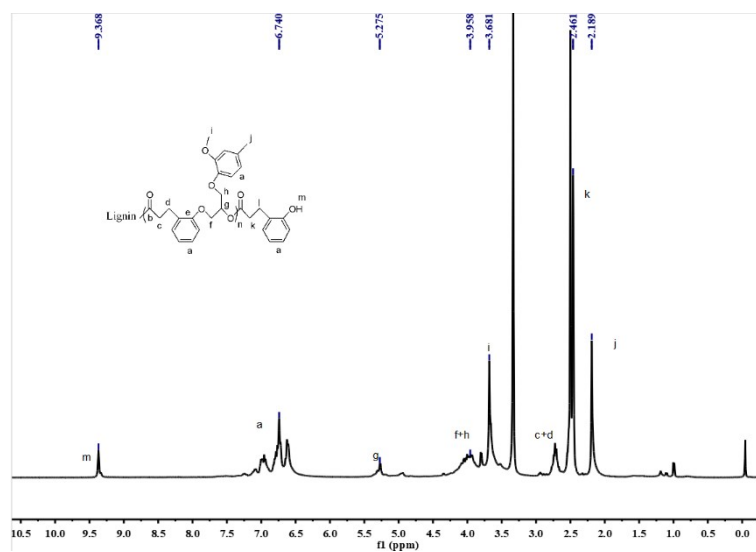

Fig. S5  $^1\text{H}$  NMR spectra of LD5MP5.

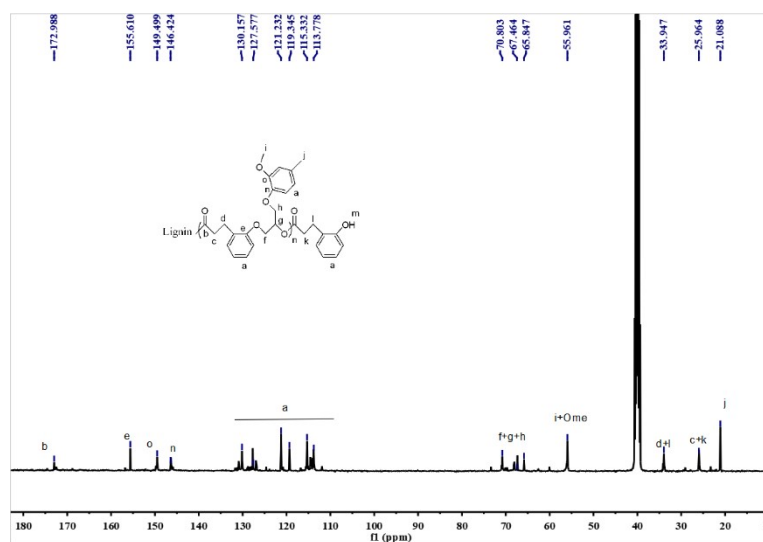

**Fig. S6**  $^{13}\text{C}$  NMR spectra of LD5MP5.

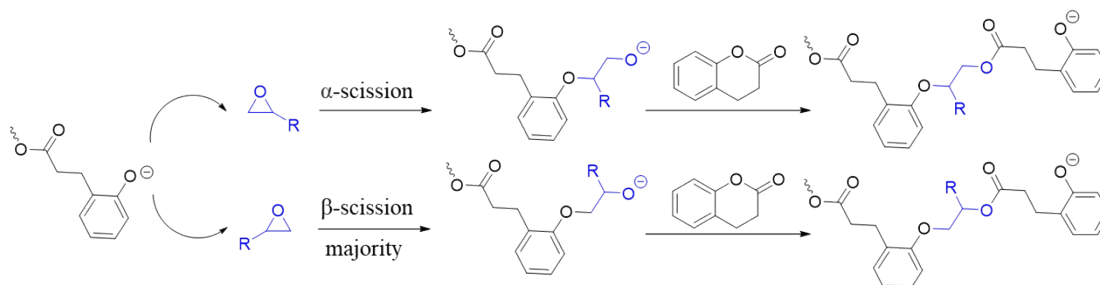

**Scheme S1**  $\beta$ -Scission and  $\alpha$ -Scission of Epoxides during the Copolymerization.

**Table S1** Molecular weight of EHL-*g*-P(DHC-*alt*-SO) and EHL.

| Sample  | Mn1    | Mw1     | $\bar{M}_w/\bar{M}_n$ 1 | Mn2   | Mw2   | $\bar{M}_w/\bar{M}_n$ 2 | Area %      |
|---------|--------|---------|-------------------------|-------|-------|-------------------------|-------------|
| EHL     | 805000 | 2326000 | 2.89                    | 1500  | 1980  | 1.31                    | 52.33/47.67 |
| LD1S1   | 626000 | 1159000 | 1.85                    | 4400  | 8990  | 2.04                    | 24.15/75.85 |
| LD3S3   | 428000 | 581000  | 1.38                    | 5700  | 7300  | 1.29                    | 51.12/48.78 |
| LD5S5-1 | 135000 | 223000  | 1.64                    | 6200  | 6680  | 1.06                    | 62.15/37.84 |
| LD5S5-2 | 632000 | 701000  | 1.11                    | 16800 | 17900 | 1.06                    | 49.77/50.23 |
| LD5S5-3 | 629000 | 793000  | 1.26                    | 1790  | 5090  | 2.83                    | 9.48/90.52  |
| LD5S5-4 | 129000 | 191000  | 1.46                    | 3000  | 4820  | 1.57                    | 99.94/0.06  |
| LD10S10 | 920000 | 1079000 | 1.17                    | 1400  | 3110  | 2.22                    | 3.09/96.91  |

Table S2 Solubility of EHL-*g*-P(DHC-*alt*-SO) in various solvents.

| Entries | Solubility <sup>a</sup> |     |                 |            |          |               |
|---------|-------------------------|-----|-----------------|------------|----------|---------------|
|         | DMSO                    | THF | Dichloromethane | Chloroform | Methanol | Ethyl acetate |
| LD5S5-1 | +                       | +   | +               | +          | ±        | ±             |
| LD5S5-2 | +                       | +   | +               | +          | ±        | ±             |
| LD5S5-3 | +                       | +   | +               | +          | ±        | ±             |
| LD5S5-4 | +                       | +   | +               | +          | ±        | ±             |
| LD1S1   | ±                       | ±   | ±               | ±          | ±        | ±             |
| LD3S3   | +                       | +   | +               | +          | ±        | ±             |
| LD10S10 | +                       | +   | +               | +          | ±        | ±             |

<sup>a</sup> “+” stands for soluble and “±” stands for swollen; usually, 100 mg sample was added into 0.5 mL solvent and kept for 1 h for the solubility test at room temperature.

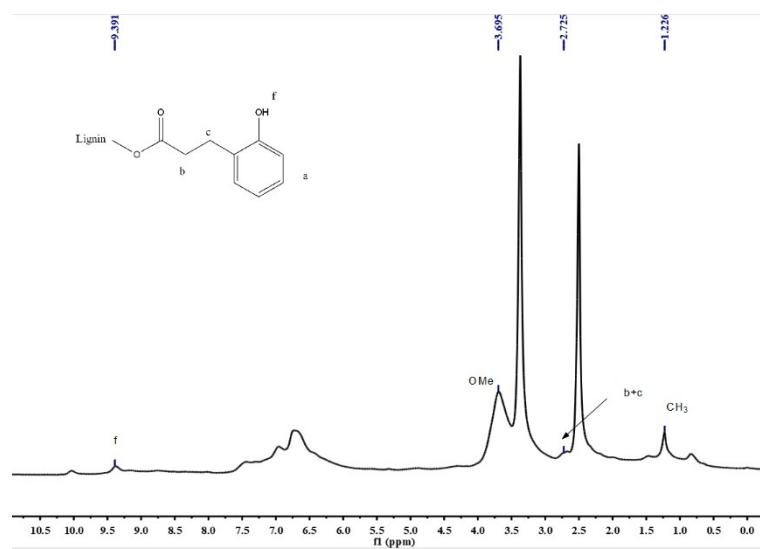

Fig. S7 <sup>1</sup>H NMR spectra of LD1S0.

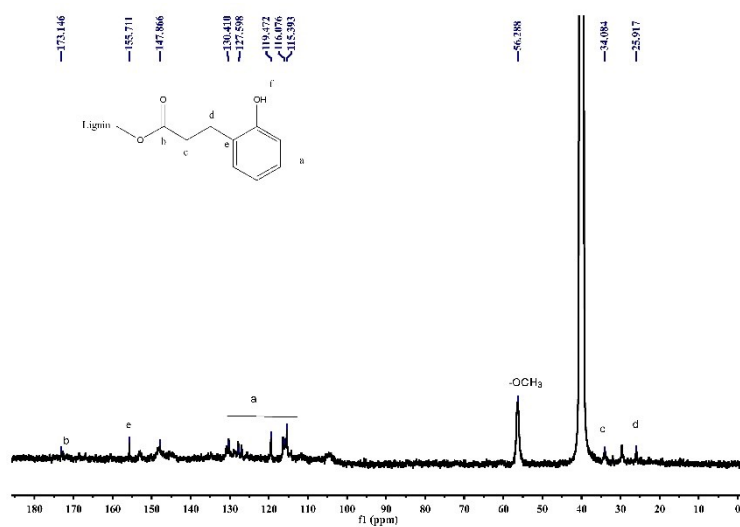

**Fig. S8**  $^{13}\text{C}$  NMR spectra of LD1S0.

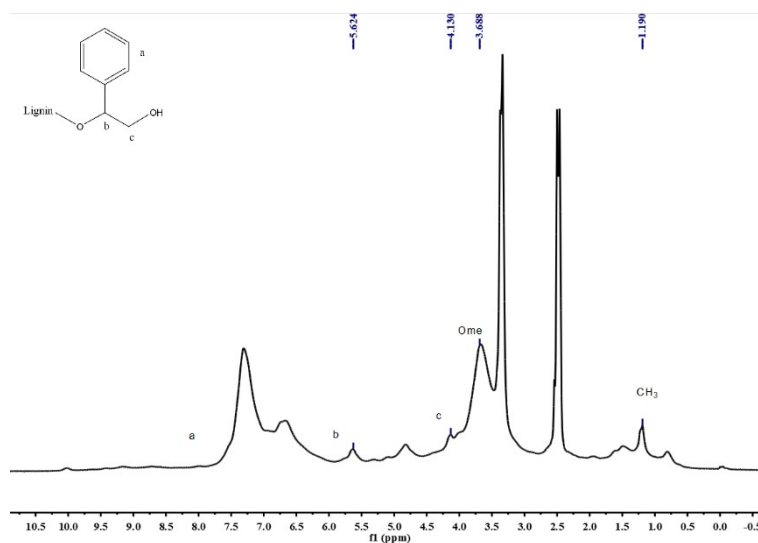

**Fig. S9**  $^1\text{H}$  NMR spectra of LD0S1.

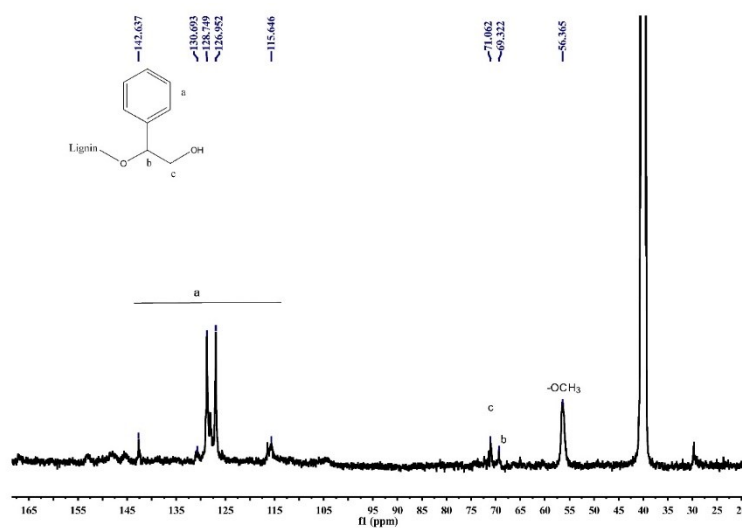

**Fig. S10**  $^{13}\text{C}$  NMR spectra of LD0S1.

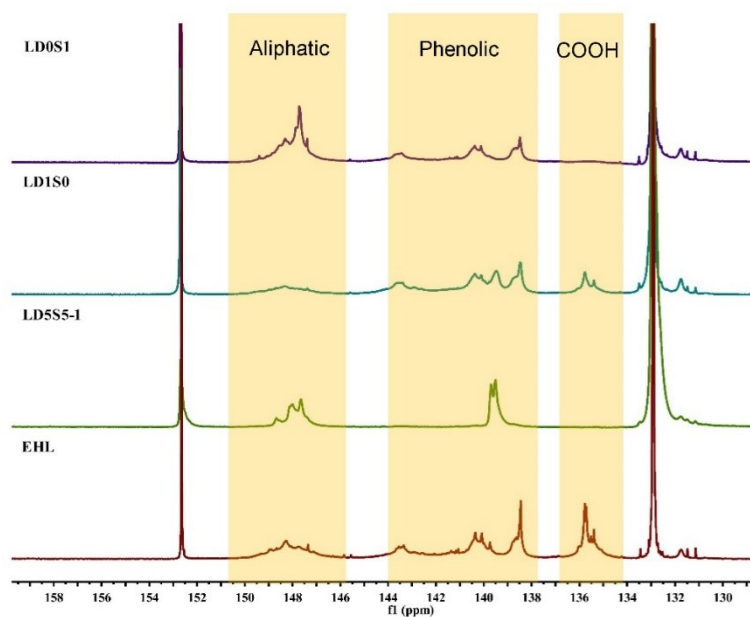

**Fig. S11**  $^{31}\text{P}$  NMR spectra of EHL, LD5S5-1, LD1S0 and LD0S1.

**Table S3** The hydroxyl contents of lignin before and after grafting copolymerization were examined by  $^{31}\text{P}$  NMR.

| Sample  | Hydroxyl content (mmol/g lignin) |          |            | Total  |
|---------|----------------------------------|----------|------------|--------|
|         | Aliphatic                        | Phenolic | Carboxylic |        |
| EHL     | 0.7379                           | 1.7931   | 0.9332     | 3.4656 |
| LD5S5-1 | 0.4424                           | 0.7757   | 0          | 1.2181 |
| LD1S0   | 0.0909                           | 1.9877   | 0.3511     | 2.7204 |
| LD0S1   | 1.4847                           | 0.8968   | 0          | 2.3815 |

**Table S4** Thermal properties of EHL and EHL-*g*-P(DHC-*alt*-EPOs).

| Entries | $T_{d-5\%}$ | $T_g$   |
|---------|-------------|---------|
| EHL     | 233.1°C     | 157.5°C |
| LD5S5-3 | 210.8°C     | 16.0°C  |
| LD1S1   | 252.4°C     | 125.4°C |
| LD3S3   | 218.9°C     | 29.1°C  |
| LD10S10 | 194.82°C    | -3.6°C  |
| LD5P5   | 231.8°C     | 12.4°C  |
| LD5C5   | 214.5°C     | 15.6°C  |
| LD5MP5  | 220.7°C     | -1.4°C  |



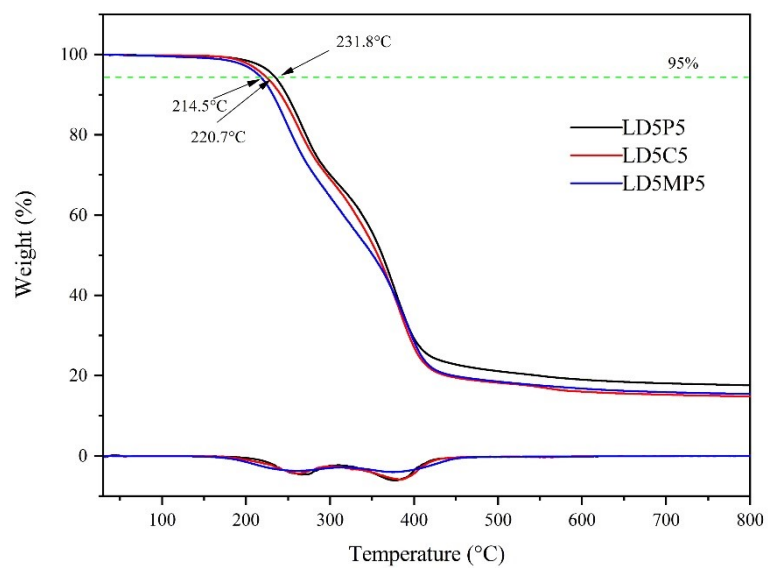

**Fig. S12** TG and DTG of LD5P5, LD5C5, and LD5MP5.

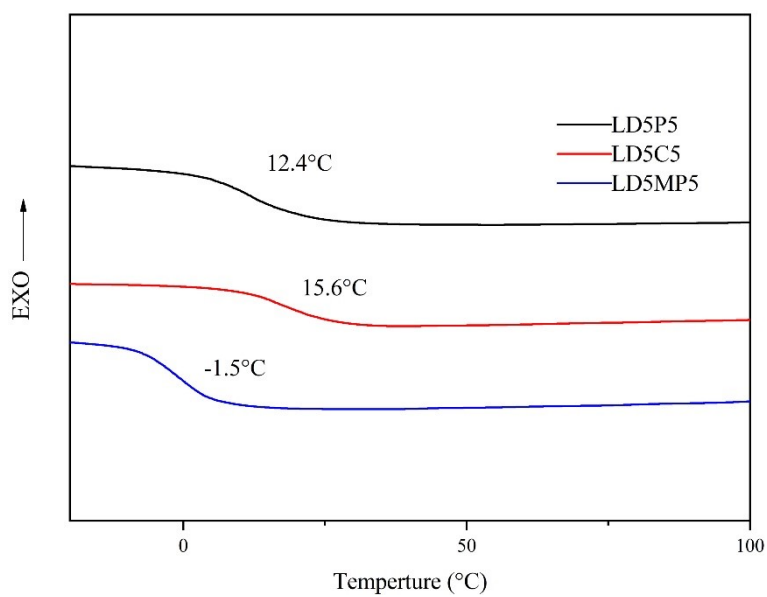

**Fig. S13** DSC curves of LD5P5, LD5C5, and LD5MP5.

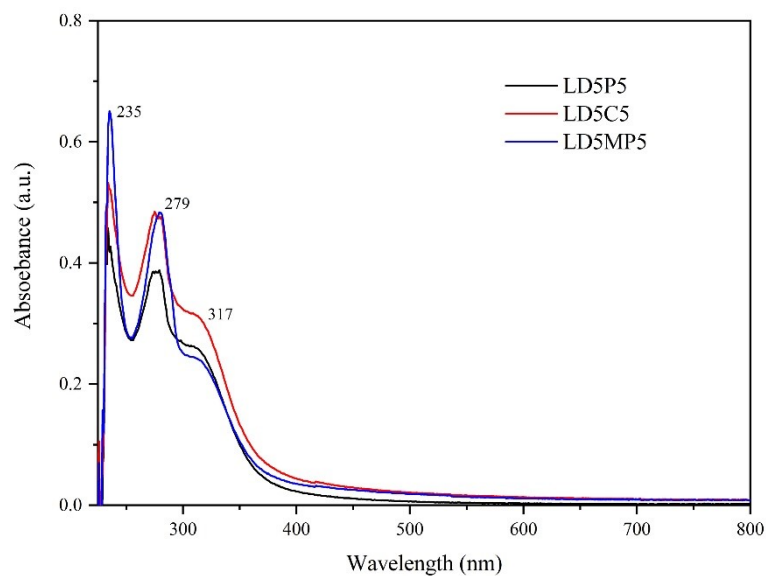

**Fig. S14** UV-Vis absorption curves of LD5P5, LD5C5, and LD5MP5.

**Table S5** The kinetic parameters for EHL-*g*-P(DHC-*alt*-SO) to DPPH.

| Concentration of LDS |          | Reaction temperature<br>T(°C) | Pseudo-first order reaction kinetic equation |         | Pseudo-second order kinetics equation      |         |
|----------------------|----------|-------------------------------|----------------------------------------------|---------|--------------------------------------------|---------|
|                      |          |                               | $k_1(\text{min}^{-1})$                       | $R^2$   | $k_3((\text{mMol/L})^{-1}\text{min}^{-1})$ | $R^2$   |
| LD5S5-3              | 0.1mg/mL | 25                            | -0.02075                                     | 0.84875 | 0.03428                                    | 0.89095 |
| LD5S5-3              | 0.5mg/mL | 25                            | -0.02365                                     | 0.85988 | 0.04325                                    | 0.90795 |
| LD5S5-3              | 1mg/mL   | 25                            | -0.02114                                     | 0.86878 | 0.03935                                    | 0.91376 |
| LD5S5-3              | 5mg/mL   | 25                            | -0.10676                                     | 0.99723 | 0.53111                                    | 0.93828 |
| LD3S3                | 0.5mg/mL | 25                            | -0.02499                                     | 0.86651 | 0.07637                                    | 0.91745 |
| LD1S1                | 0.5mg/mL | 25                            | -0.04917                                     | 0.90557 | 0.24235                                    | 0.97611 |
| LD5S5-3              | 0.5mg/mL | 35                            | -0.0288                                      | 0.85355 | 0.0605                                     | 0.91292 |
| LD5S5-3              | 0.5mg/mL | 45                            | -0.0496                                      | 0.91053 | 0.22614                                    | 0.96288 |

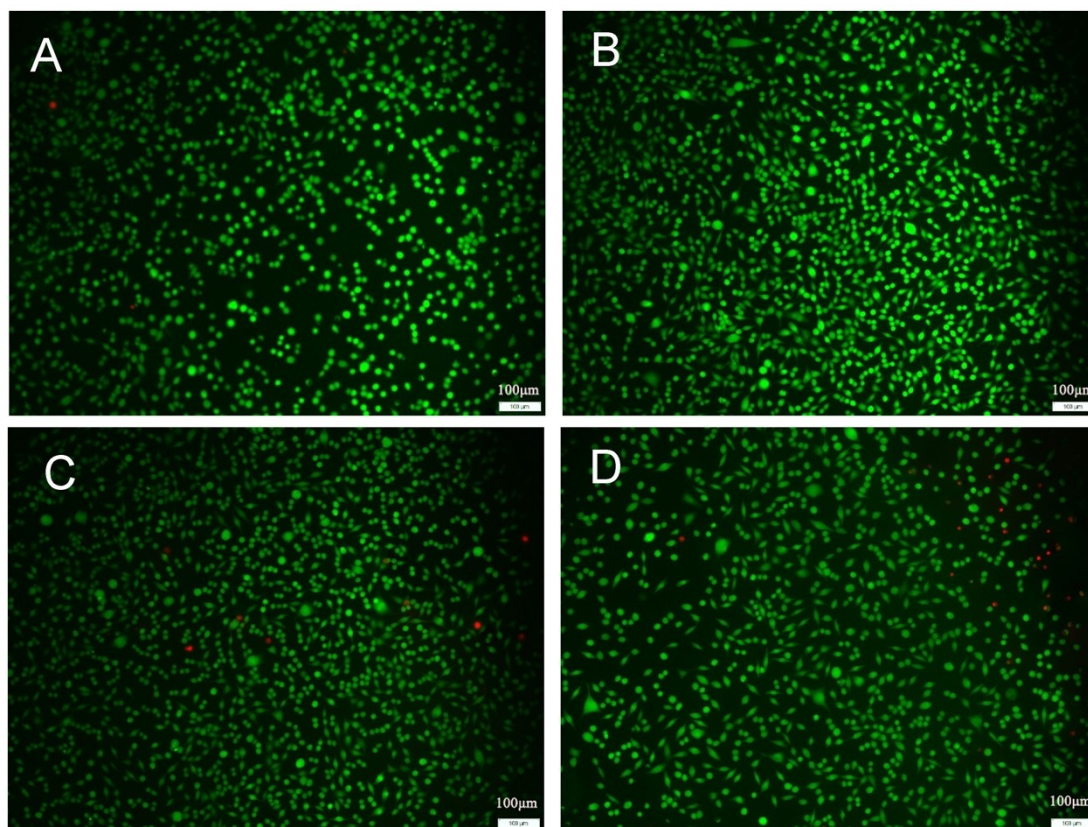

**Fig. S15** Fluorescent images of L929 cells stained by Calcein-AM (green) and PI (red) treated with 0.05 mg/mL LD5S5-3 (A); treated with 0.1 mg/mL LD5S5-3 (B); treated with 0.2 mg/mL LD5S5-3 (C); treated with 1 mg/mL LD5S5-3 (D).

**Table S6** Comparison of SPF of lignin-based materials

| code           | materials                                 | method        | SPF   |
|----------------|-------------------------------------------|---------------|-------|
| 1 <sup>1</sup> | lignin                                    | /             | 5.72  |
| 2 <sup>2</sup> | Sodium lignosulfonate + methacrylate      | ATRP          | 2.45  |
| 3 <sup>3</sup> | alkali lignin + vinyl benzophenone        | ATRP          | 18    |
| 4 <sup>4</sup> | Lignosulfonate + TiO <sub>2</sub>         | Self-assembly | 15.57 |
| 5 <sup>5</sup> | alkali lignin + 2,4-dihydroxybenzophenone | Self-assembly | 22.31 |
| 6 <sup>6</sup> | Lignosulfonate + catechol                 | Self-assembly | 27    |

1. Y. Qian, X. Qiu and S. Zhu, *Green Chem.*, 2015, **17**, 320-324.
2. D. Kai, Y. K. Chua, L. Jiang, C. Owh, S. Y. Chan and X. J. Loh, *Rsc Adv.*, 2016, **6**, 86420-86427.
3. Y. Wu, Y. Qian, A. Zhang, H. Lou, D. Yang and X. Qiu, *Ind. Eng. Chem. Res.*, 2020, **59**, 17057-17068.
4. J. Yu, L. Li, Y. Qian, H. Lou, D. Yang and X. Qiu, *Ind. Eng. Chem. Res.*, 2018, **57**, 15740-15748.
5. Y. Wu, Y. Qian, H. Lou, D. Yang and X. Qiu, *Acs Sustain. Chem. Eng.*, 2019, **7**, 15966-15973.
6. A. Zhang, X. Wu, X. Ouyang, H. Lou, D. Yang, Y. Qian and X. Qiu, *Acs Sustain. Chem. Eng.*, 2022, **10**, 9381-9388.
